# Supplementary material for: A General Approach to Test for Interaction Among Mixtures of Insecticidal Proteins Which Target Different Orders of Insect Pests
Source: PubMed Central journal article supplement — J Insect Sci. 2017 Mar 10;17(2):39. doi: 10.1093/jisesa/iex003 (PMC5416900; doi:10.1093/jisesa/iex003), 2017-03-10

**Supplemental Data**

**Table i. Insecticidal Activity of Cry1Ab, Vip3Aa20, and Cry1F individually against ECB at 120 h after treatment.**

| Test protein | Protein concentration (ng/ml) | % Mortality ( $\bar{x}$ ) |
|--------------|-------------------------------|---------------------------|
| Cry1Ab       | 200                           | 67                        |
|              | 100                           | 43                        |
|              | 50                            | 45                        |
|              | 25                            | 14                        |
|              | 12.5                          | 6                         |
| Vip3Aa20     | 100                           | 0                         |
|              | 50                            | 4                         |
|              | 25                            | 8                         |
|              | 12.5                          | 1                         |
|              | 6.3                           | 3                         |
| Cry1F        | 400                           | 63                        |
|              | 200                           | 38                        |
|              | 100                           | 7                         |
|              | 50                            | 2                         |
|              | 25                            | 4                         |

Data were corrected for control mortality using Abbott's formula

Three 24-well plates per dose were used for each treatment or control being tested

**Table ii. Insecticidal Activity of Cry1Ab, Vip3Aa20, and Cry1F individually against FAW at 120 h after treatment.**

| Test protein | Protein concentration (ng/ml) | % Mortality ( $\bar{x}$ ) |
|--------------|-------------------------------|---------------------------|
| Cry1Ab       | 200                           | 1                         |
|              | 100                           | 1                         |
|              | 50                            | 4                         |
|              | 25                            | 6                         |
|              | 12.5                          | 3                         |
| Vip3Aa20     | 400                           | 61                        |
|              | 200                           | 52                        |
|              | 100                           | 44                        |
|              | 50                            | 14                        |
|              | 25                            | 6                         |
| Cry1F        | 2000                          | 76                        |
|              | 1000                          | 53                        |
|              | 500                           | 39                        |
|              | 250                           | 12                        |
|              | 125                           | 13                        |

Data were corrected for control mortality using Abbott's formula

Three 24-well plates per dose were used for each treatment or control being tested

**Table iii. Insecticidal Activity of eCry3.1Ab and mCry3A individually against CPB at 120 h after treatment.**

| Test protein | Protein concentration (µg/ml) | % Mortality (x̄) |
|--------------|-------------------------------|------------------|
| eCry3.1Ab    | 12.5                          | 64.0             |
|              | 6.3                           | 49.6             |
|              | 3.1                           | 48.9             |
|              | 1.6                           | 25.2             |
|              | 0.8                           | 25.2             |
|              | 0.4                           | 22.3             |
|              | 0.2                           | 18.0             |
| mCry3A       | 8                             | 57.3             |
|              | 4                             | 51.4             |
|              | 2                             | 39.7             |
|              | 1                             | 29.4             |
|              | 0.5                           | 20.6             |
|              | 0.3                           | 17.6             |
|              | 0.1                           | 10.3             |

Data were corrected for control mortality using Abbott's formula

Three 24-well plates per dose were used for each treatment or control being tested

**Table iv. Lepidopteran-active protein mixtures used in ECB dose-response treatments**

| Concentration of lepidopteran-active protein mixture | Cry1Ab + Vip3Aa20 + Cry1F (ng/ml diet) |
|------------------------------------------------------|----------------------------------------|
| 1X                                                   | 400 + 200 + 800                        |
| X/2                                                  | 200 + 100 + 400                        |
| X/4                                                  | 100 + 50 + 200                         |
| X/8                                                  | 50 + 25 + 100                          |
| X/16                                                 | 25 + 12.5 + 50                         |
| X/32                                                 | 12.5 + 6.25 + 25                       |
| X/64                                                 | 6.25 + 3.125 + 12.5                    |
| X/128                                                | 3.125 + 1.5625 + 6.25                  |
| N/A (buffer)                                         | N/A (20 mM CAPS, pH 10.5)              |

Serial dilutions were performed in 20 mM CAPS (pH 10.5)

One 24-well plate per dose was used for each treatment or control being tested

**Table v. Coleopteran-active protein mixtures used in CPB dose-response treatments.**

| <b>Concentration of coleopteran-active protein mixture</b> | <b>eCry3.1Ab + mCry3A (<math>\mu\text{g/ml}</math> diet)</b> |
|------------------------------------------------------------|--------------------------------------------------------------|
| 1X                                                         | 8 + 8                                                        |
| X/2                                                        | 4 + 4                                                        |
| X/4                                                        | 2 + 2                                                        |
| X/8                                                        | 1 + 1                                                        |
| X/16                                                       | 0.5 + 0.5                                                    |
| X/32                                                       | 0.25 + 0.25                                                  |
| X/64                                                       | 0.125 + 0.125                                                |
| X/128                                                      | 0.0625 + 0.0625                                              |
| N/A (buffer)                                               | N/A (1:1 10 mM ammonium bicarbonate, pH 10.0 : water)        |

Serial dilutions were performed in 1:1 (v/v) 10 mM ammonium bicarbonate, pH 10.0 to purified water

One 24-well plate per dose was used for each treatment or control being tested

**Table vi. Experimental set-up of the ECB bioassay to assess the potential for a protein interaction.**

| <b>Species</b> | <b>lepidopteran-active protein mixture concentration</b> | <b>coleopteran-active protein mixture concentration</b> | <b>purpose</b>          |
|----------------|----------------------------------------------------------|---------------------------------------------------------|-------------------------|
| <b>ECB</b>     | <b>ECB low dose</b>                                      | -                                                       | <b>Test entry</b>       |
| <b>ECB</b>     | <b>ECB high dose</b>                                     | -                                                       | <b>Test entry</b>       |
| <b>ECB</b>     | <b>ECB low dose</b>                                      | <b>CPB high dose</b>                                    | <b>Test entry</b>       |
| <b>ECB</b>     | <b>ECB high dose</b>                                     | <b>CPB high dose</b>                                    | <b>Test entry</b>       |
| <b>ECB</b>     | -                                                        | <b>CPB high dose</b>                                    | <b>Negative control</b> |
| <b>CPB</b>     | -                                                        | <b>CPB high dose</b>                                    | <b>Positive control</b> |
| <b>ECB</b>     | -                                                        | -                                                       | <b>Buffer Controls</b>  |

**Table vii. Experimental set-up of the CPB bioassay to assess the potential for a protein interaction.**

| <b>Species</b> | <b>coleopteran-active protein mixture concentration</b> | <b>lepidopteran-active protein mixture concentration</b> | <b>purpose</b>          |
|----------------|---------------------------------------------------------|----------------------------------------------------------|-------------------------|
| <b>CPB</b>     | <b>CPB low dose</b>                                     | <b>-</b>                                                 | <b>Test entry</b>       |
| <b>CPB</b>     | <b>CPB high dose</b>                                    | <b>-</b>                                                 | <b>Test entry</b>       |
| <b>CPB</b>     | <b>CPB low dose</b>                                     | <b>ECB high dose</b>                                     | <b>Test entry</b>       |
| <b>CPB</b>     | <b>CPB high dose</b>                                    | <b>ECB high dose</b>                                     | <b>Test entry</b>       |
| <b>CPB</b>     | <b>-</b>                                                | <b>ECB high dose</b>                                     | <b>Negative control</b> |
| <b>ECB</b>     | <b>-</b>                                                | <b>ECB high dose</b>                                     | <b>Positive control</b> |
| <b>CPB</b>     | <b>-</b>                                                | <b>-</b>                                                 | <b>Buffer Controls</b>  |

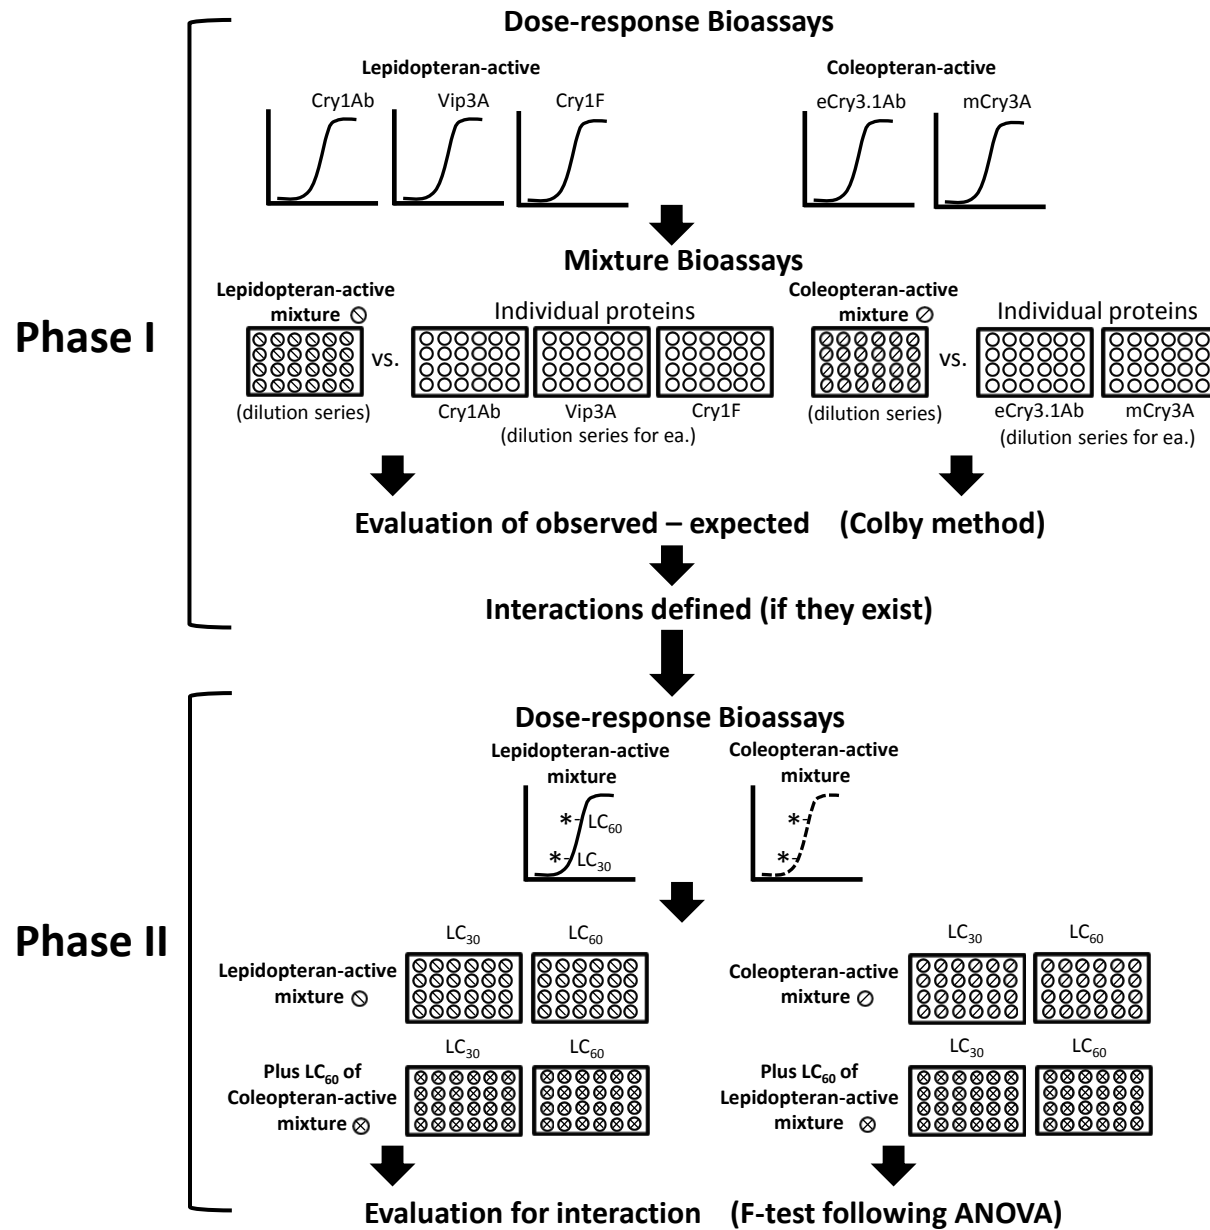

**Phase I**

**Phase II**

Fig.2

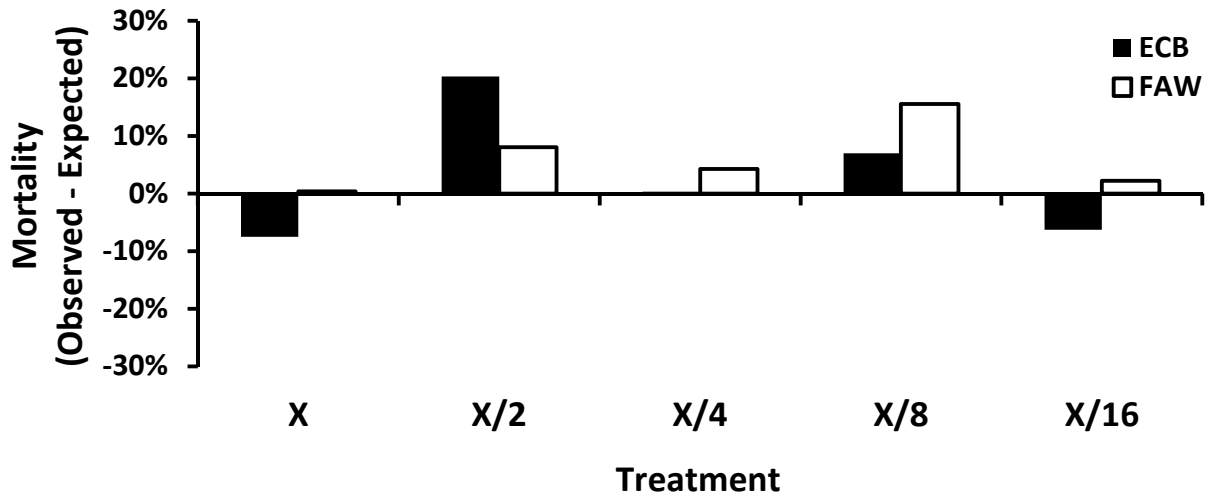

Fig.3

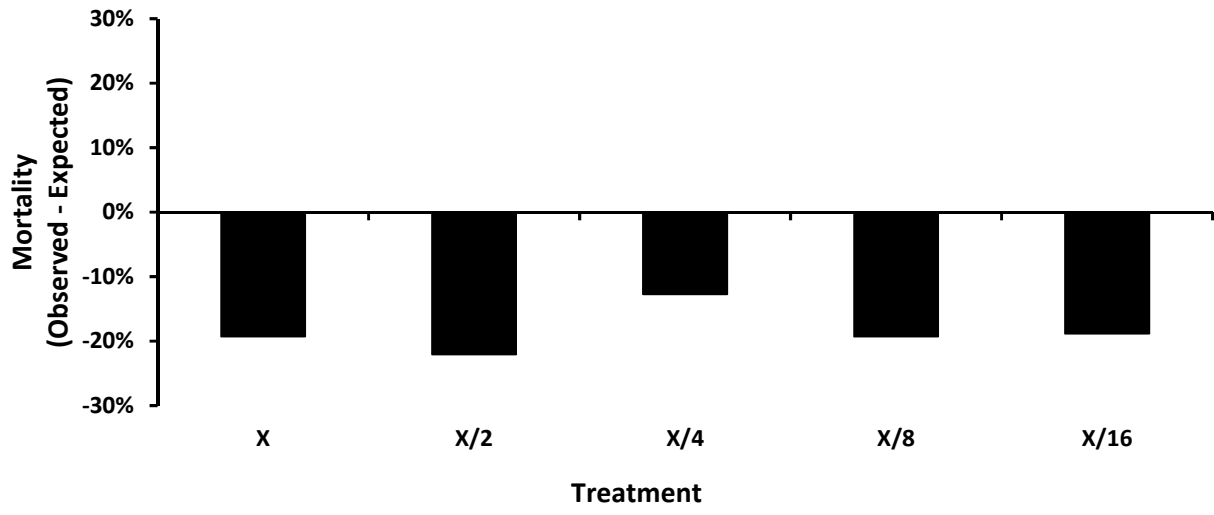

Fig.4

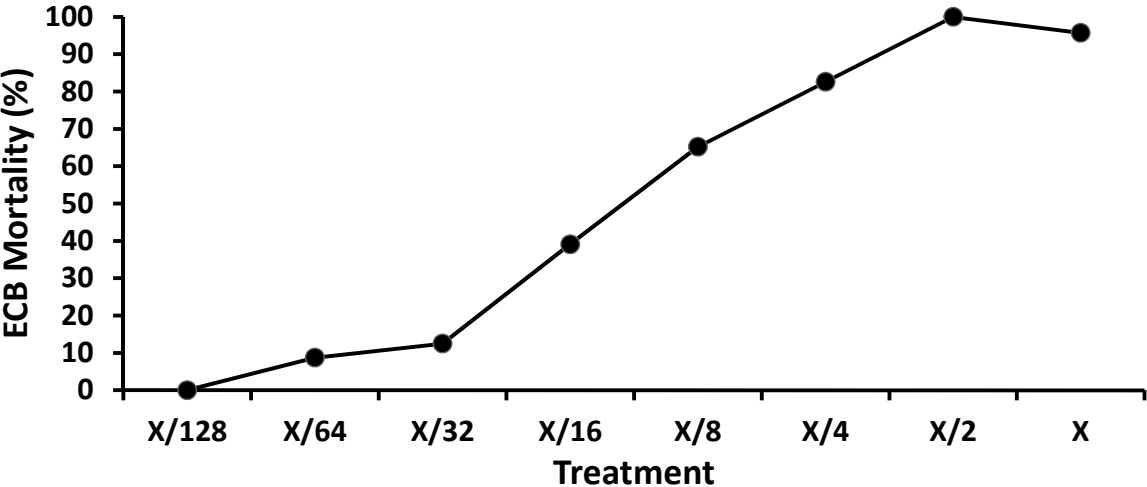



Fig.5

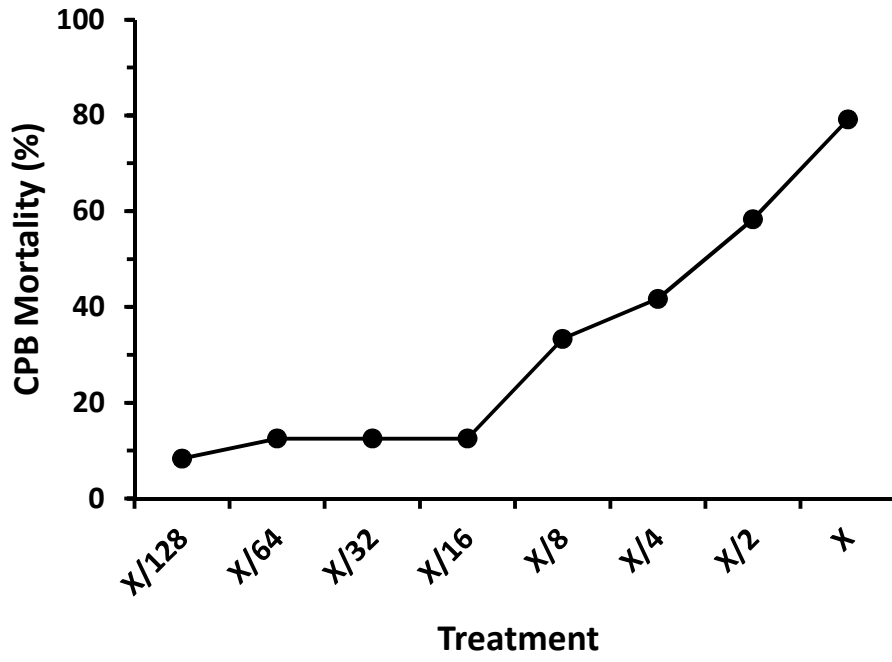

Supplement: iex003_Supp.pdf [file iex003_Supp.pdf]
